# Supplementary material for: Tissue-specific alternative splicing of TCF7L2
Source: PubMed Central journal article supplement — Hum Mol Genet. 2009 Jul 14;18(20):3795–804. doi: 10.1093/hmg/ddp321 (PMC2748888; doi:10.1093/hmg/ddp321), 2009-07-14

**SUPPLEMENTARY MATERIALS**

**Tissue-specific alternative splicing of *TCF7L2***

Ludmila Prokunina-Olsson, Cullan Welch, Ola Hansson, Neeta Adhikari, Laura Scott, Nicolle Usher, Maurine Tong, Andrew Sprau, Amy Swift, Lori Bonnycastle, Michael Erdos, Zhi He, Richa Saxena, Brennan Harmon, Olga Kotova, Eric Hoffman, David Altshuler, Leif Groop, Michael Boehnke, Francis Collins and Jennifer L. Hall.

**Supplementary Table 1. Expression of assay “ex7-8” of *TCF7L2*, normalized by expression of reference genes *B2M* ( $\beta$ -2 microglobulin), *GAPDH* (Glyceraldehyde-3-phosphate dehydrogenase) or both genes**

| Tissues, cells                    | dCt (Log2) relative to expression of reference genes * |        |               |
|-----------------------------------|--------------------------------------------------------|--------|---------------|
|                                   | B2M                                                    | GAPDH  | B2M and GAPDH |
| pancreas                          | -3.22                                                  | -3.75  | -3.48         |
| colon                             | -3.37                                                  | -3.94  | -3.66         |
| brain                             | -1.96                                                  | -6.21  | -4.09         |
| small intestine                   | -3.74                                                  | -4.59  | -4.16         |
| monocytes, CD14+                  | -5.24                                                  | -3.09  | -4.16         |
| lung                              | -5.24                                                  | -3.61  | -4.42         |
| cultured adipocytes               | -3.89                                                  | -6.28  | -5.08         |
| kidney                            | -3.97                                                  | -6.32  | -5.15         |
| spleen                            | -6.35                                                  | -4.00  | -5.18         |
| liver                             | -4.88                                                  | -5.80  | -5.34         |
| pancreatic islets                 | -4.96                                                  | -6.01  | -5.48         |
| heart                             | -4.31                                                  | -7.41  | -5.86         |
| skeletal muscle                   | -3.66                                                  | -10.46 | -7.06         |
| blood mononuclear cells           | -8.76                                                  | -6.30  | -7.53         |
| T cells, CD8+                     | -9.36                                                  | -5.92  | -7.64         |
| B cells, CD19+                    | -10.41                                                 | -6.98  | -8.69         |
| T cells, CD4+                     | -11.45                                                 | -7.89  | -9.67         |
| lymphoblastoid cells, CEPH        | -12.01                                                 | -14.11 | -13.06        |
| activated B cells, CD19+          | -13.96                                                 | -13.63 | -13.80        |
| activated blood mononuclear cells | -14.02                                                 | -13.93 | -13.98        |
| activated T cells, CD4+           | -13.35                                                 | -14.90 | -14.12        |
| activated T cells, CD8+           | -16.32                                                 | -15.11 | -15.71        |

\* calculated according to formula:  $dCt = Ct_{reference} - Ct_{target}$ , where “reference” represents levels of expression (Ct values) of B2M, GAPDH or both genes and “target” represents level of expression of *TCF7L2*; negative Ct means that a target is expressed lower than a reference gene; fold difference in expression between a reference and a target can be calculated as  $2^{(dCt)}$ . Each tissue is represented by one sample or a mix of several samples.

**Supplementary Table 2. Alternative splicing within *TCF7L2***

| Alternative feature                                                   | Position, Build 36.1              | Sequence of alternative features                           |                                                                                                                 | Detected by assay                 |
|-----------------------------------------------------------------------|-----------------------------------|------------------------------------------------------------|-----------------------------------------------------------------------------------------------------------------|-----------------------------------|
|                                                                       |                                   | <u>Underlined</u> – position of transcriptions start sites | <b>(BOLD)</b> – short alternative fragments                                                                     |                                   |
| TSS1<br>-536 bp<br>promoter                                           | chr10:114,699,999                 | <u>AA</u> TAATCTCCGCTCCAGACTACTCCGTTCCCTCCGGATTTCG         | ATCCCCCCTTTTCTATCTGTC                                                                                           | TSS1                              |
| TSS2<br>+83 bp, ex1                                                   | chr10:114,700,588                 | <u>AGG</u> GAGAAGAGCTCCGAAAACCTCCTCGGCAGAGAGGGATT          | AGCTG                                                                                                           | TSS2                              |
| TSS3<br>+200 bp,<br>intron1                                           | chr10:114,700,723                 | <u>TTTT</u> TTATCTTTTTCTGGGCTTGGCAAATGTTGCTGAAAGG          | GGAGA                                                                                                           | TSS3                              |
| TSS_P2intr1<br>+239 bp,<br>intron1                                    | chr10:114,700,744                 | <u>TTGG</u> CAAATGTTGATGAAAGGGGAGAAATCGGGGCTGGGG           | GCGGC                                                                                                           | TSS3                              |
| TSS_P2intr1<br>+302 bp,<br>intron1                                    | chr10:114,700,807                 | <u>GCGT</u> GTGCGTACGGTGCCACCATTGCAAAAACCTGTAACCC          | TGTTT                                                                                                           | TSS3                              |
| TSS_P2intr1<br>+338 bp,<br>intron1                                    | chr10:114,700,842                 | <u>TA</u> ACCCTGTTTTTTCTACCCCCCTCGACCTCGCCGATTCTT          | TTTCT                                                                                                           | TSS3                              |
| Ex3a, 69bp                                                            | chr10:114,714,305-<br>114,714,373 | CTCCATTTTCAGTCCGGCAGCACACATTACTCTGCGTACAA                  | AACGATTGAACACCAGATTGCAGTTCAG                                                                                    | ex3a-4                            |
| Exon 4a,<br>141bp                                                     | chr10:114,839,149-<br>114,839,289 | AGCCCCCTCCCTTGCTGCACTCAGGGACATGACTGTCAGCA                  | CTTCTACCCCCCTCAGACTTCACTGTCAGCACTCAAGTCTT<br>CAGGGACATGAAAAGGAGCCACTCCTTACAAAAAGTTGGG<br>GAGCCCTGGTGTATTGAG     | ex4-4a                            |
| Exon 4a,<br>144bp, with<br>extra 3bp                                  | chr10:114,839,146-<br>114,839,289 | <b>(CAG)</b> AGCCCCCTCCCTTGCTGCACTCAGGGACATGACTGTC         | AGCACTTCTACCCCCCTCAGACTTCACTGTCAGCACTCAA<br>GTCTTCAGGGACATGAAAAGGAGCCACTCCTTACAAAAAGT<br>TGGGGAGCCCTGGTGTATTGAG | ex4-4a                            |
| Exon 6, 103<br>bp,with/witho<br>ut 12 bp in the<br>end                | chr10:114,893,672-<br>114,893,774 | GAATCCACGGCCTCCGCACCCTCCAGATATATCCCCGTAT                   | TACCCACTATCGCCTGGCACCGTAGGACAAATCCCCCATCC<br>GCTAGGATG( <b>GTTAGTACCACA</b> )                                   | Not measured                      |
| Exon 8, 141<br>bp,<br>with/without<br>extra 15 bp in<br>the beginning | chr10:114,900,732-<br>114,900,872 | <b>(CTTTCTGTCTTCTAG)</b> GTTCCCTCCCCATATGGTCCCACCA         | CATCATAACGCTACACACGACGGGCATTCCGCATCCGGCCAT<br>AGTCACACCAACAGTCAAACAGGAATCGTCCCAGAGTGAT<br>GTCGGCTCACTCCATAGTTC  | Not measured                      |
| Ex12, 51 bp                                                           | chr10:114,908,416-<br>114,908,466 | AACACAGCGAATGTTTCCTAAATCCTTGCCTTTCACTTCCTC                 | CGATTACAG                                                                                                       | Ex12-13                           |
| Ex13, 73 bp                                                           | chr10:114,909,669-<br>114,909,741 | ACCTGAGCGCTCCTAAGAAATGCCGAGCGCGCTTTGGCCTT                  | GATCAACAGAATAACTGGTGCGGCCCTTGCAAG                                                                               | ex11-13,<br>ex13-14, ex13-<br>13a |
| Ex13a, 73 bp                                                          | chr10:114,910,368-<br>114,910,440 | ATGCAAATACTCCAAAGAAGTGTCGGGCACTGTTCCGGGCTT                 | GACCGACAGACTTTATGGTGCAAACCGTGCAAG                                                                               | ex11-13a,<br>ex13-13a             |
| Ex13b, 25 bp                                                          | chr10:114,911,328-<br>114,911,352 | TCTTTGAATTTGGAATATTACAATG                                  |                                                                                                                 | ex13-13b                          |

**Supplementary Table 3. Characteristics of splicing forms of *TCF7L2***

| GenBank accession number | Structure *      | Detected by assay | Type of C-terminal end (short, medium, long)<br>Location of stop codon | Expression, tissues                                                                                                        |
|--------------------------|------------------|-------------------|------------------------------------------------------------------------|----------------------------------------------------------------------------------------------------------------------------|
| FJ010166                 | Ex1-11,12,13,13a | Ex13-13a          | short, stop codon in exon 13a                                          | Low expression, highest expression in liver, lowest in pancreas                                                            |
| FJ010167                 | Ex1-11,13a, 14   | Ex11-13a          | long, stop codon in end of ex14                                        | First/ second common splicing form, lowest expression in skeletal muscles                                                  |
| FJ010168                 | Ex1-11,13,13b    | Ex13-13b          | short, stop codon in ex 13b                                            | Low expression, detectable in pancreatic islets, colon and at a lower level in pancreas but negative in many other tissues |
| FJ010169                 | Ex1-11,12,13,13b | Ex13-13b          | short, stop codon in ex 13b                                            | Low expression, detectable in pancreatic islets, colon and at a lower level in pancreas but negative in many other tissues |
| FJ010172                 | Ex1-11,14        | Ex11-14           | medium, stop codon in beginning of ex14                                | First/ second common splicing form                                                                                         |
| FJ010173                 | Ex1-11,12,13,14  | Ex12-13           | long, stop codon in end of ex14                                        | Highest expression in monocytes, lowest in lymphoblasts                                                                    |
| FJ010174                 | Ex1-11,13,14     | Ex11-13           | long, stop codon in end of ex 14                                       | Highest expression in skeletal muscles, lowest in lymphoblasts                                                             |

\* - combinatorial use of alternative start sites and alternative exons 3a and 4a and inclusion of 3, 12 and 15 bp within exons 4a, 6 and 8 was not evaluated

**Supplementary Table 4. Relative abundance of *TCF7L2* splicing forms with different C-terminal ends in human tissues, compared to highest expressing form in each tissue**

| Tissue,<br>Type of C-<br>terminal end  | Ex11,14<br>Medium | Ex11,12,13,14<br>Long | Ex11,13,14<br>Long | Ex11,13a,14<br>Long | Ex11,12,13,13a<br>Short | Ex11,12,13,13b<br>Short |
|----------------------------------------|-------------------|-----------------------|--------------------|---------------------|-------------------------|-------------------------|
| Detected by<br>assays                  | Ex11-14           | Ex12-13               | Ex11-13            | Ex11-13a            | Ex13-13a                | Ex13-13b                |
| Pancreatic islets<br>n=22              | <b>1.0</b>        | 0.33                  | 0.20               | 0.62                | 0.08                    | 0.04                    |
| Pancreas<br>n=36                       | <b>1.0</b>        | 0.27                  | 0.15               | 0.88                | 0.008                   | 0.0015                  |
| Colon<br>n=81                          | 0.89              | 0.21                  | 0.12               | <b>1.0</b>          | 0.02                    | <0.001                  |
| Liver<br>n=30                          | 0.66              | 0.45                  | 0.25               | <b>1.0</b>          | 0.19                    | Negative                |
| Monocytes<br>n=61                      | 0.77              | <b>1.00</b>           | 0.10               | 0.29                | 0.08                    | Negative                |
| Subcutaneous<br>adipose tissue<br>n=14 | <b>1.0</b>        | 0.56                  | 0.36               | 0.25                | 0.10                    | Negative                |
| Skeletal muscles,<br>N=27              | <b>1.0</b>        | 0.57                  | 0.50               | 0.13                | 0.08                    | Negative                |
| Lymphoblasts,<br>n=17                  | <b>1.0</b>        | 0.10                  | 0.09               | 0.34                | 0.01                    | Negative                |

**Supplementary Table 5A. Effects of age, sex, BMI, CMV infection and islet purity on expression of *TCF7L2* and other genes in pancreatic islets, Set 1, US, n=18**

| Expression assay      | factors, p-value for multiple linear regression |              |                        |                                 |                  |
|-----------------------|-------------------------------------------------|--------------|------------------------|---------------------------------|------------------|
|                       | Age, years                                      | Sex          | BMI, kg/m <sup>2</sup> | CMV                             | Islets Purity, % |
| TSS1                  | 0.545                                           | 0.214        | 0.292                  | 0.264                           | 0.912            |
| TSS2                  | 0.663                                           | 0.193        | 0.698                  | 0.318                           | 0.865            |
| TSS3                  | 0.232                                           | 0.122        | 0.817                  | 0.120                           | 0.810            |
| ex3a-4                | 0.730                                           | 0.105        | 0.152                  | 0.197                           | 0.818            |
| ex7-8                 | 0.750                                           | 0.328        | 0.683                  | 0.205                           | 0.986            |
| ex11-13               | 0.444                                           | 0.202        | 0.750                  | 0.108                           | 0.913            |
| ex12-13               | 0.609                                           | 0.320        | 0.399                  | <b>0.029</b><br>higher with CMV | 0.623            |
| ex13-13a              | 0.634                                           | 0.396        | 0.306                  | 0.054                           | 0.718            |
| ex11-13a              | 0.729                                           | 0.418        | 0.116                  | 0.421                           | 0.622            |
| ex11-14               | 0.909                                           | 0.337        | 0.992                  | 0.360                           | 0.851            |
| ex13-14               | 0.640                                           | 0.829        | 0.574                  | 0.075                           | 0.541            |
| ex13-13b              | 0.217                                           | 0.574        | 0.227                  | <b>0.008</b><br>higher with CMV | 0.981            |
| Proinsulin            | 0.571                                           | 0.732        | 0.497                  | 0.988                           | 0.424            |
| Proglucagon           | 0.160                                           | <b>0.025</b> | 0.423                  | 0.172                           | 0.437            |
| Ghrelin/<br>obestatin | 0.454                                           | 0.282        | 0.238                  | 0.588                           | 0.393            |
| Somatostatin          | 0.328                                           | 0.163        | 0.089                  | 0.526                           | 0.473            |
| Chromogranin A        | 0.221                                           | 0.730        | 0.845                  | 0.097                           | 0.690            |
| PDX1                  | 0.685                                           | 0.134        | 0.157                  | 0.542                           | 0.877            |
| PCNA                  | 0.679                                           | 0.127        | 0.159                  | 0.731                           | 0.811            |
| VIP                   | 0.353                                           | 0.831        | 0.487                  | 0.610                           | 0.275            |

For each trait, the association of all listed variables was jointly evaluated using multiple linear regression; only samples that include all of the evaluated factors are included into analysis. In bold p-values <0.05

**Supplementary Table 5B. Effects of age, sex and BMI on expression of *TCF7L2* and other genes in pancreas, n=34**

| Expression assay  | factors, p-value for multiple linear regression |              |                        |
|-------------------|-------------------------------------------------|--------------|------------------------|
|                   | Age, years                                      | Sex          | BMI, Kg/m <sup>2</sup> |
| TSS1              | 0.352                                           | 0.327        | 0.263                  |
| TSS2              | 0.537                                           | 0.540        | 0.372                  |
| TSS3              | 0.218                                           | 0.939        | 0.341                  |
| ex3a-4            | 0.088                                           | 0.718        | 0.721                  |
| ex7-8             | 0.230                                           | 0.960        | 0.747                  |
| ex11-13           | 0.619                                           | 0.503        | 0.208                  |
| ex12-13           | 0.239                                           | 0.420        | 0.974                  |
| ex13-13a          | 0.409                                           | 0.126        | 0.899                  |
| ex11-13a          | 0.437                                           | 0.919        | 0.512                  |
| ex11-14           | 0.318                                           | 0.948        | 0.649                  |
| ex13-14           | 0.744                                           | 0.159        | 0.433                  |
| ex13-13b          | <b>0.025</b>                                    | 0.106        | 0.667                  |
| Proinsulin        | 0.091                                           | 0.054        | 0.890                  |
| Proglucagon       | <b>0.009</b>                                    | 0.657        | 0.722                  |
| Ghrelin/obestatin | 0.217                                           | <b>0.007</b> | <b>0.045</b>           |
| Somatostatin      | 0.035                                           | 0.209        | 0.959                  |
| Chromogranin A    | 0.083                                           | 0.096        | 0.485                  |

For each trait, the association of all listed variables was jointly evaluated using multiple linear regression; only samples that include all of the evaluated factors are included into analysis. In bold p-values <0.05

**Supplementary Table 5C. Effects of age, sex and BMI on expression of *TCF7L2* and other genes in colon, n= 51**

| Expression assay                                   | factors, p-value for multiple linear regression |                                     |            |
|----------------------------------------------------|-------------------------------------------------|-------------------------------------|------------|
|                                                    | Age, years                                      | Sex                                 | BMI, Kg/m2 |
| TSS1                                               | 0.814                                           | 0.199                               | 0.684      |
| TSS2                                               | 0.986                                           | 0.237                               | 0.983      |
| TSS3                                               | 0.655                                           | 0.430                               | 0.259      |
| ex3a-4                                             | 0.548                                           | 0.791                               | 0.912      |
| ex7-8                                              | 0.926                                           | 0.168                               | 0.663      |
| ex11-13                                            | 0.101                                           | 0.856                               | 0.792      |
| ex12-13                                            | 0.612                                           | 0.189                               | 0.110      |
| ex13-13a                                           | 0.600                                           | 0.732                               | 0.650      |
| ex11-13a                                           | 0.535                                           | 0.774                               | 0.265      |
| ex11-14                                            | 0.240                                           | 0.599                               | 0.195      |
| ex13-14                                            | 0.124                                           | 0.671                               | 0.455      |
| ex13-13b                                           | 0.661                                           | 0.673                               | 0.127      |
| Proglucagon<br>(Glucagon-Like<br>Peptide 1, GLP-1) | 0.484                                           | <b>&lt;0.001</b><br>higher in males | 0.236      |
| Somatostatin                                       | 0.048                                           | 0.174                               | 0.744      |
| Chromogranin A                                     | 0.587                                           | 0.573                               | 0.413      |

For each trait, the association of all listed variables was jointly evaluated using multiple linear regression; only samples that include all of the evaluated factors are included into analysis. In bold p-values <0.05

**Supplementary Table 5D. Effects of age and sex on expression of *TCF7L2* in peripheral blood monocytes, n=63**

| Expression assay | factors, p-value for multiple linear regression |       |
|------------------|-------------------------------------------------|-------|
|                  | Age, years                                      | Sex   |
| TSS1             | 0.366                                           | 0.086 |
| TSS2             | 0.267                                           | 0.091 |
| TSS3             | 0.270                                           | 0.205 |
| ex3a-4           | 0.279                                           | 0.192 |
| ex7-8            | 0.877                                           | 0.163 |
| ex11-13          | 0.353                                           | 0.684 |
| ex12-13          | 0.410                                           | 0.294 |
| ex13-13a         | 0.597                                           | 0.597 |
| ex11-13a         | 0.337                                           | 0.954 |
| ex11-14          | 0.207                                           | 0.429 |
| ex13-14          | 0.125                                           | 0.871 |

For each trait, the association of all listed variables was jointly evaluated using multiple linear regression; only samples that include all of the evaluated factors are included into analysis. In bold p-values <0.05

**Supplementary Table 5E. Effects of age and sex on expression of *TCF7L2* in liver, n=59**

| Expression assay | factors, p-value for multiple linear regression |       |
|------------------|-------------------------------------------------|-------|
|                  | Age, years                                      | Sex   |
| TSS1             | <b>0.017</b>                                    | 0.483 |
| TSS2             | 0.065                                           | 0.395 |
| TSS3             | 0.182                                           | 0.144 |
| ex3a-4           | 0.211                                           | 0.912 |
| ex7-8            | <b>0.020</b>                                    | 0.949 |
| ex11-13          | 0.184                                           | 0.260 |
| ex12-13          | 0.317                                           | 0.071 |
| ex13-13a         | 0.158                                           | 0.056 |
| ex11-13a         | 0.232                                           | 0.184 |
| ex11-14          | 0.227                                           | 0.221 |
| ex13-14          | <b>0.022</b>                                    | 0.618 |

For each trait, the association of all listed variables was jointly evaluated using multiple linear regression; only samples that include all of the evaluated factors are included into analysis. In bold p-values <0.05



**Supplementary Table 5F. Effects of age and sex on expression of *TCF7L2* in subcutaneous adipose tissue, n=14**

| Expression assay | factors, p-value for multiple linear regression |            |
|------------------|-------------------------------------------------|------------|
|                  | Age, years                                      | BMI, Kg/m2 |
| TSS1             | <b>0.008</b>                                    | 0.400      |
| TSS2             | 0.981                                           | 0.658      |
| TSS3             | 0.484                                           | 0.827      |
| ex3a-4           | 0.907                                           | 0.743      |
| ex7-8            | 0.947                                           | 0.365      |
| ex11-13          | 0.400                                           | 0.473      |
| ex12-13          | 0.696                                           | 0.634      |
| ex13-13a         | 0.721                                           | 0.292      |
| ex11-13a         | 0.737                                           | 0.424      |
| ex11-14          | 0.600                                           | 0.964      |
| ex13-14          | 0.210                                           | 0.593      |

For each trait, the association of all listed variables was jointly evaluated using multiple linear regression; only samples that include all of the evaluated factors are included into analysis. In bold p-values <0.05

**Supplementary Table 5G. Effects of age, sex and diagnosis on expression of *TCF7L2* in skeletal muscles, n=25**

| Expression assay | factors, p-value for multiple linear regression |       |                                                 |
|------------------|-------------------------------------------------|-------|-------------------------------------------------|
|                  | Age, years                                      | Sex   | Diagnosis:<br>healthy/<br>muscular degeneration |
| TSS1             | 0.703                                           | 0.476 | 0.538                                           |
| TSS2             | 0.748                                           | 0.729 | 0.979                                           |
| TSS3             | 0.812                                           | 0.398 | <b>0.009</b><br>lower in disease                |
| ex3a-4           | 0.577                                           | 0.697 | 0.504                                           |
| ex7-8            | 0.667                                           | 0.828 | 0.758                                           |
| ex11-13          | 0.671                                           | 0.818 | 0.083                                           |
| ex12-13          | 0.710                                           | 0.363 | 0.817                                           |
| ex13-13a         | 0.220                                           | 0.186 | 0.884                                           |
| ex11-13a         | 0.724                                           | 0.753 | 0.635                                           |
| ex11-14          | 0.555                                           | 0.790 | 0.852                                           |
| ex13-14 *        | 0.270                                           | 0.613 | 0.802                                           |

For each trait, the association of all listed variables was jointly evaluated using multiple linear regression; only samples that include all of the evaluated factors are included into analysis. In bold p-values <0.05

**Supplementary Table 6A. Sample characteristics and *T2F7L2* expression by genotypes of SNPs in pancreatic islets, Set 1, US, n=26**

| Traits,<br>expression assays | rs7903146     |    |        |      |               | rs12255372    |    |        |      |               |
|------------------------------|---------------|----|--------|------|---------------|---------------|----|--------|------|---------------|
|                              | geno<br>types | n  | mean   | fold | p-value<br>** | geno<br>types | n  | mean   | fold | p-value<br>** |
| BMI, kg/m2                   | CC            | 10 | 26.41  | ref  | 0.418         | GG            | 5  | 27.08  | ref  | 0.751         |
|                              | TT            | 7  | 28.34  | 1.07 |               | TG            | 13 | 27.24  | 1.01 |               |
|                              | TT            | 5  | 28.30  | 1.07 |               | TT            | 4  | 28.62  | 1.06 |               |
| Age, years                   | CC            | 10 | 38.30  | ref  | 0.457         | GG            | 5  | 39.60  | ref  | 0.732         |
|                              | TC            | 7  | 43.48  | 1.14 |               | TG            | 13 | 41.62  | 1.05 |               |
|                              | TT            | 5  | 48.20  | 1.26 |               | TT            | 4  | 47.25  | 1.19 |               |
| Islets viability, %          | CC            | 9  | 90.89  | ref  | 0.454         | GG            | 4  | 92.50  | ref  | 0.676         |
|                              | TC            | 6  | 93.17  | 1.03 |               | TG            | 12 | 91.17  | 0.99 |               |
|                              | TT            | 5  | 88.20  | 0.97 |               | TT            | 4  | 88.50  | 0.96 |               |
| Islets purity, %             | CC            | 9  | 85.56  | ref  | 0.830         | GG            | 4  | 85.00  | ref  | 0.825         |
|                              | TC            | 6  | 86.67  | 1.01 |               | TG            | 12 | 86.25  | 1.01 |               |
|                              | TT            | 5  | 84.00  | 0.98 |               | TT            | 4  | 83.75  | 0.99 |               |
| Cold time, h                 | CC            | 9  | 11.99  | ref  | 0.541         | GG            | 4  | 13.31  | ref  | 0.834         |
|                              | TC            | 5  | 15.75  | 1.31 |               | TG            | 11 | 13.76  | 1.03 |               |
|                              | TT            | 4  | 13.00  | 1.08 |               | TT            | 3  | 11.33  | 0.85 |               |
| CMV infection<br>frequency   | CC            | 10 | 0.80   | ref  | 0.413         | GG            | 5  | 1.00   | ref  | 0.131         |
|                              | TC            | 6  | 0.50   | 0.63 |               | TG            | 12 | 0.58   | 0.58 |               |
|                              | TT            | 4  | 0.50   | 0.63 |               | TT            | 3  | 0.33   | 0.33 |               |
| TSS1 *                       | CC            | 12 | -2.67  | ref  | 0.747         | GG            | 6  | -2.07  | ref  | 0.246         |
|                              | TC            | 7  | -2.62  | 1.04 |               | TG            | 14 | -2.87  | 0.57 |               |
|                              | TT            | 5  | -3.14  | 0.72 |               | TT            | 4  | -3.33  | 0.42 |               |
| TSS2 *                       | CC            | 12 | -4.64  | ref  | 0.760         | GG            | 6  | -4.08  | ref  | 0.355         |
|                              | TC            | 7  | -4.46  | 1.13 |               | TG            | 14 | -4.78  | 0.62 |               |
|                              | TT            | 5  | -4.99  | 0.78 |               | TT            | 4  | -5.11  | 0.49 |               |
| TSS3 *                       | CC            | 12 | -9.18  | ref  | 0.839         | GG            | 6  | -8.30  | ref  | 0.353         |
|                              | TC            | 7  | -8.77  | 1.33 |               | TG            | 14 | -9.30  | 0.50 |               |
|                              | TT            | 5  | -9.09  | 1.06 |               | TT            | 4  | -9.26  | 0.51 |               |
| ex3a-4 *                     | CC            | 12 | -5.86  | ref  | 0.591         | GG            | 6  | -5.48  | ref  | 0.213         |
|                              | TC            | 7  | -6.01  | 0.90 |               | TG            | 14 | -6.10  | 0.65 |               |
|                              | TT            | 5  | -6.39  | 0.69 |               | TT            | 4  | -6.51  | 0.49 |               |
| ex7-8 *                      | CC            | 12 | -4.87  | ref  | 0.746         | GG            | 6  | -4.34  | ref  | 0.198         |
|                              | TC            | 7  | -4.82  | 1.04 |               | TG            | 14 | -5.07  | 0.60 |               |
|                              | TT            | 5  | -5.23  | 0.78 |               | TT            | 4  | -5.33  | 0.50 |               |
| ex11-13 *                    | CC            | 12 | -8.39  | ref  | 0.848         | GG            | 6  | -7.71  | ref  | 0.244         |
|                              | TC            | 7  | -8.19  | 1.15 |               | TG            | 14 | -8.54  | 0.56 |               |
|                              | TT            | 5  | -8.58  | 0.88 |               | TT            | 4  | -8.76  | 0.48 |               |
| ex12-13 *                    | CC            | 12 | -7.21  | ref  | 0.169         | GG            | 6  | -6.58  | ref  | <b>0.010</b>  |
|                              | TC            | 7  | -7.72  | 0.70 |               | TG            | 14 | -7.69  | 0.46 |               |
|                              | TT            | 5  | -8.50  | 0.41 |               | TT            | 4  | -8.96  | 0.19 |               |
| ex13-13a *                   | CC            | 12 | -9.24  | ref  | 0.242         | GG            | 6  | -8.66  | ref  | <b>0.022</b>  |
|                              | TC            | 7  | -9.86  | 0.65 |               | TG            | 14 | -9.76  | 0.47 |               |
|                              | TT            | 5  | -10.23 | 0.50 |               | TT            | 4  | -10.60 | 0.26 |               |
| ex11-13a *                   | CC            | 12 | -6.52  | ref  | 0.619         | GG            | 6  | -6.08  | ref  | 0.181         |
|                              | TC            | 7  | -6.93  | 0.75 |               | TG            | 14 | -6.93  | 0.55 |               |
|                              | TT            | 5  | -6.94  | 0.75 |               | TT            | 4  | -6.99  | 0.53 |               |
| ex11-14 *                    | CC            | 12 | -5.99  | ref  | 0.848         | GG            | 6  | -5.52  | ref  | 0.357         |
|                              | TC            | 7  | -5.94  | 1.04 |               | TG            | 14 | -6.18  | 0.63 |               |
|                              | TT            | 5  | -6.30  | 0.81 |               | TT            | 4  | -6.30  | 0.58 |               |
| ex13-14 *                    | CC            | 12 | -6.07  | ref  | 0.144         | GG            | 6  | -5.06  | ref  | <b>0.002</b>  |
|                              | TC            | 7  | -6.52  | 0.73 |               | TG            | 14 | -6.82  | 0.30 |               |
|                              | TT            | 5  | -7.46  | 0.38 |               | TT            | 4  | -7.49  | 0.19 |               |
| ex13-13b *                   | CC            | 13 | -10.89 | ref  | 0.244         | GG            | 6  | -9.84  | ref  | <b>0.003</b>  |
|                              | TC            | 6  | -11.82 | 0.52 |               | TG            | 14 | -11.71 | 0.27 |               |

|                     |    |    |        |      |       |    |    |        |      |              |
|---------------------|----|----|--------|------|-------|----|----|--------|------|--------------|
|                     | TT | 6  | -11.79 | 0.54 |       | TT | 5  | -12.06 | 0.21 |              |
| Proinsulin *        | CC | 13 | 2.09   | ref  | 0.129 | GG | 6  | 1.52   | ref  | <b>0.037</b> |
|                     | TC | 6  | 2.09   | 1.00 |       | TG | 14 | 2.34   | 1.77 |              |
|                     | TT | 6  | 0.57   | 0.35 |       | TT | 5  | 0.27   | 0.42 |              |
| Proglucagon *       | CC | 13 | 5.10   | ref  | 0.363 | GG | 6  | 5.93   | ref  | 0.063        |
|                     | TC | 6  | 4.11   | 0.50 |       | TG | 14 | 4.42   | 0.35 |              |
|                     | TT | 5  | 4.83   | 0.83 |       | TT | 4  | 4.45   | 0.36 |              |
| Ghrelin/obestatin * | CC | 13 | -7.97  | ref  | 0.478 | GG | 6  | -8.52  | ref  | 0.563        |
|                     | TC | 6  | -8.42  | 0.73 |       | TG | 14 | -8.02  | 1.41 |              |
|                     | TT | 6  | -9.00  | 0.49 |       | TT | 5  | -8.95  | 0.74 |              |
| Somatostatin *      | CC | 13 | 0.43   | ref  | 0.651 | GG | 6  | -0.16  | ref  | 0.670        |
|                     | TC | 6  | 0.22   | 0.86 |       | TG | 14 | 0.42   | 1.49 |              |
|                     | TT | 6  | -0.27  | 0.62 |       | TT | 5  | -0.14  | 1.01 |              |
| Chromogranin A *    | CC | 13 | 1.44   | ref  | 0.544 | GG | 6  | 2.03   | ref  | <b>0.063</b> |
|                     | TC | 6  | 0.94   | 0.71 |       | TG | 14 | 1.02   | 0.50 |              |
|                     | TT | 6  | 1.04   | 0.76 |       | TT | 5  | 0.83   | 0.44 |              |
| PDX1 *              | CC | 13 | -5.87  | ref  | 0.674 | GG | 6  | -5.77  | ref  | 0.601        |
|                     | TC | 6  | -6.42  | 0.68 |       | TG | 14 | -6.10  | 0.80 |              |
|                     | TT | 6  | -6.49  | 0.65 |       | TT | 5  | -6.76  | 0.50 |              |
| PCNA1 *             | CC | 13 | -5.12  | ref  | 0.577 | GG | 6  | -4.82  | ref  | 0.419        |
|                     | TC | 7  | -5.44  | 0.80 |       | TG | 15 | -5.50  | 0.62 |              |
|                     | TT | 6  | -5.66  | 0.69 |       | TT | 5  | -5.44  | 0.65 |              |
| VIP *               | CC | 13 | -9.93  | ref  | 0.571 | GG | 6  | -9.61  | ref  | 0.643        |
|                     | TC | 5  | -10.81 | 0.54 |       | TG | 13 | -10.80 | 0.44 |              |
|                     | TT | 6  | -11.18 | 0.42 |       | TT | 5  | -10.42 | 0.57 |              |

\* expression of assays, normalized to expression level of reference gene B2M, Log 2 scale

\*\* p-values for univariate linear regression under an additive genetic model for SNPs not adjusted for covariates; in bold p-values <0.05

**Supplementary Table 6B. Sample characteristics and *T2F7L2* expression by genotypes of SNPs in pancreatic islets, Set 2, Sweden, n=24**

| Traits,<br>expression assays | rs7903146     |    |        |      |               | rs12255372    |    |        |      |               |
|------------------------------|---------------|----|--------|------|---------------|---------------|----|--------|------|---------------|
|                              | geno<br>types | n  | mean   | fold | p-value<br>** | geno<br>types | n  | mean   | fold | p-value<br>** |
| BMI, kg/m2                   | CC            | 13 | 26.29  | ref  | 0.738         | GG            | 13 | 26.47  | ref  | 0.313         |
|                              | TT            | 10 | 25.15  | 0.96 |               | TG            | 11 | 25.04  | 0.95 |               |
|                              | TT            | 1  | 26.30  | 1.0  |               | TT            | 0  |        |      |               |
| Age, years                   | CC            | 13 | 57.23  | ref  | 0.622         | GG            | 13 | 60.00  | ref  | 0.053         |
|                              | TC            | 10 | 52.30  | 0.91 |               | TG            | 11 | 49.82  | 0.83 |               |
|                              | TT            | 1  | 61.00  | 1.07 |               | TT            | 0  |        |      |               |
| Islets purity, %             | CC            | 13 | 69.23  | ref  | 0.296         | GG            | 13 | 63.85  | ref  | 0.786         |
|                              | TC            | 10 | 53.80  | 0.78 |               | TG            | 11 | 61.18  | 0.96 |               |
|                              | TT            | 1  | 65.00  | 0.94 |               | TT            | 0  |        |      |               |
| HbA1c                        | CC            | 10 | 5.35   | ref  | 0.918         | GG            | 9  | 5.47   | ref  | 0.681         |
|                              | TC            | 7  | 5.47   | 1.03 |               | TG            | 9  | 5.34   | 0.98 |               |
|                              | TT            | 1  | 5.50   | 1.00 |               | TT            | 0  |        |      |               |
| ex11-13 *                    | CC            | 11 | -8.68  | ref  | <b>0.007</b>  | GG            | 11 | -8.68  | ref  | 0.891         |
|                              | TC            | 8  | -8.22  | 1.38 |               | TG            | 9  | -8.60  | 1.06 |               |
|                              | TT            | 1  | -11.7  | 0.12 |               | TT            | 0  |        |      |               |
| ex12-13 *                    | CC            | 9  | -7.75  | ref  | 0.058         | GG            | 9  | -7.56  | ref  | 0.290         |
|                              | TC            | 7  | -6.68  | 2.10 |               | TG            | 7  | -6.93  | 1.55 |               |
|                              | TT            | 0  |        |      |               | TT            | 0  |        |      |               |
| ex13-13a *                   | CC            | 12 | -9.83  | ref  | <b>0.011</b>  | GG            | 12 | -9.67  | ref  | 0.726         |
|                              | TC            | 8  | -8.70  | 2.19 |               | TG            | 9  | -9.41  | 1.20 |               |
|                              | TT            | 1  | -13.28 | 0.09 |               | TT            | 0  |        |      |               |
| ex11-13a *                   | CC            | 8  | -7.23  | ref  | <b>0.003</b>  | GG            | 8  | -7.10  | ref  | 0.933         |
|                              | TC            | 7  | -6.60  | 1.55 |               | TG            | 8  | -7.14  | 0.97 |               |
|                              | TT            | 1  | -9.89  | 0.16 |               | TT            | 0  |        |      |               |
| ex11-14 *                    | CC            | 11 | -6.46  | ref  | <b>0.007</b>  | GG            | 11 | -6.45  | ref  | 0.907         |
|                              | TC            | 8  | -6.11  | 1.27 |               | TG            | 9  | -6.51  | 0.96 |               |
|                              | TT            | 1  | -9.65  | 0.11 |               | TT            | 0  |        |      |               |
| ex13-14 *                    | CC            | 11 | -7.06  | ref  | <b>0.044</b>  | GG            | 11 | -7.06  | ref  | 0.759         |
|                              | TC            | 8  | -6.90  | 1.12 |               | TG            | 9  | -7.23  | 0.89 |               |
|                              | TT            | 1  | -9.92  | 0.14 |               | TT            | 0  |        |      |               |
| ex13-13b *                   | CC            | 11 | -10.91 | ref  | <b>0.017</b>  | GG            | 10 | -10.99 | ref  | 0.372         |
|                              | TC            | 6  | -11.30 | 0.76 |               | TG            | 8  | -11.58 | 0.66 |               |
|                              | TT            | 1  | -14.69 | 0.07 |               | TT            | 0  |        |      |               |

\* expression of assays, normalized to expression level of reference gene B2M, Log 2 scale

\*\* p-values for univariate linear regression under an additive genetic model for SNPs not adjusted for covariates; in bold p-values <0.05

**Supplementary Table 6C. Sample characteristics and *T2F7L2* expression by genotypes of SNPs in pancreas, n=46**

| Traits and assays | rs7903146  |    |        |      |            | rs12255372 |    |        |      |            |
|-------------------|------------|----|--------|------|------------|------------|----|--------|------|------------|
|                   | geno types | n  | mean   | fold | p-value ** | geno types | n  | mean   | fold | p-value ** |
| BMI, kg/m2        | CC         | 24 | 27.89  | ref  | 0.578      | GG         | 24 | 27.92  | ref  | 0.418      |
|                   | TC         | 11 | 27.99  | 1.00 |            | TG         | 11 | 27.57  | 0.99 |            |
|                   | TT         | 3  | 33.42  | 1.20 |            | TT         | 3  | 34.70  | 1.24 |            |
| Age, years        | CC         | 29 | 56.86  | Ref  | 0.093      | GG         | 31 | 53.64  | ref  | 0.511      |
|                   | TC         | 15 | 52.33  | 0.92 |            | TG         | 13 | 52.69  | 0.98 |            |
|                   | TT         | 3  | 36.00  | 0.63 |            | TT         | 3  | 64.66  | 1.21 |            |
| TSS1 *            | CC         | 27 | -2.88  | ref  | 0.599      | GG         | 28 | -2.85  | ref  | 0.903      |
|                   | TC         | 13 | -2.75  | 1.09 |            | TG         | 11 | -2.78  | 1.05 |            |
|                   | TT         | 2  | -2.66  | 1.16 |            | TT         | 3  | -2.80  | 1.04 |            |
| TSS2 *            | CC         | 27 | -4.67  | ref  | 0.698      | GG         | 28 | -4.63  | ref  | 0.941      |
|                   | TC         | 13 | -4.55  | 1.09 |            | TG         | 11 | -4.57  | 1.04 |            |
|                   | TT         | 2  | -4.48  | 1.14 |            | TT         | 3  | -4.64  | 0.99 |            |
| TSS3 *            | CC         | 27 | -12.00 | ref  | 0.685      | GG         | 28 | -12.01 | ref  | 0.982      |
|                   | TC         | 13 | -12.08 | 0.95 |            | TG         | 11 | -12.02 | 0.99 |            |
|                   | TT         | 2  | -11.70 | 1.23 |            | TT         | 3  | -11.94 | 1.05 |            |
| ex3a-4*           | CC         | 27 | -7.55  | ref  | 0.800      | GG         | 28 | -7.55  | ref  | 0.948      |
|                   | TC         | 13 | -7.62  | 0.95 |            | TG         | 11 | -7.60  | 0.97 |            |
|                   | TT         | 2  | -7.18  | 1.29 |            | TT         | 3  | -7.47  | 1.06 |            |
| ex7-8 *           | CC         | 27 | -4.94  | ref  | 0.171      | GG         | 28 | -4.98  | ref  | 1.000      |
|                   | TC         | 13 | -5.21  | 0.83 |            | TG         | 11 | -4.99  | 0.99 |            |
|                   | TT         | 2  | -4.20  | 1.67 |            | TT         | 3  | -4.99  | 0.99 |            |
| ex11-13 *         | CC         | 27 | -9.48  | ref  | 0.545      | GG         | 28 | -9.47  | ref  | 0.611      |
|                   | TC         | 13 | -9.38  | 1.07 |            | TG         | 11 | -9.40  | 1.05 |            |
|                   | TT         | 2  | -8.98  | 1.41 |            | TT         | 3  | -9.08  | 1.31 |            |
| ex12-13 *         | CC         | 27 | -8.59  | ref  | 0.642      | GG         | 28 | -8.54  | ref  | 0.933      |
|                   | TC         | 13 | -8.38  | 1.16 |            | TG         | 11 | -8.49  | 1.04 |            |
|                   | TT         | 2  | -8.38  | 1.16 |            | TT         | 3  | -8.39  | 1.11 |            |
| ex13-13a *        | CC         | 27 | -13.69 | ref  | 0.190      | GG         | 28 | -13.65 | ref  | 0.941      |
|                   | TC         | 13 | -13.72 | 0.98 |            | TG         | 11 | -13.63 | 1.01 |            |
|                   | TT         | 2  | -12.32 | 2.58 |            | TT         | 3  | -13.42 | 1.17 |            |
| ex11-13a *        | CC         | 27 | -6.90  | ref  | 0.448      | GG         | 28 | -6.89  | ref  | 0.437      |
|                   | TC         | 13 | -6.87  | 1.02 |            | TG         | 11 | -6.90  | 0.99 |            |
|                   | TT         | 2  | -6.35  | 1.47 |            | TT         | 3  | -6.44  | 1.37 |            |
| ex11-14 *         | CC         | 27 | -6.72  | ref  | 0.515      | GG         | 28 | -6.71  | ref  | 0.491      |
|                   | TC         | 13 | -6.66  | 1.04 |            | TG         | 11 | -6.68  | 1.02 |            |
|                   | TT         | 2  | -6.26  | 1.38 |            | TT         | 3  | -6.31  | 1.32 |            |
| ex13-14 *         | CC         | 27 | -7.98  | ref  | 0.347      | GG         | 28 | -8.02  | ref  | 0.922      |
|                   | TC         | 14 | -7.91  | 1.05 |            | TG         | 13 | -7.93  | 1.06 |            |
|                   | TT         | 3  | -8.51  | 0.69 |            | TT         | 3  | -7.96  | 1.04 |            |
| ex13-13b *        | CC         | 24 | -14.34 | ref  | 0.455      | GG         | 26 | -14.48 | ref  | 0.766      |

|                         |    |    |        |      |       |    |    |        |      |       |
|-------------------------|----|----|--------|------|-------|----|----|--------|------|-------|
|                         | TC | 14 | -14.68 | 0.79 |       | TG | 12 | -14.44 | 1.03 |       |
|                         | TT | 2  | -15.21 | 0.55 |       | TT | 2  | -15.01 | 0.69 |       |
| Proinsulin *            | CC | 27 | -1.19  | ref  | 0.851 | GG | 28 | -1.04  | ref  | 0.640 |
|                         | TC | 14 | -1.35  | 0.90 |       | TG | 13 | -1.47  | 0.74 |       |
|                         | TT | 3  | -.80   | 1.31 |       | TT | 3  | -1.64  | 0.66 |       |
| Proglucagon *           | CC | 26 | -1.62  | ref  | 0.374 | GG | 28 | -1.44  | ref  | 0.770 |
|                         | TC | 15 | -1.76  | 0.91 |       | TG | 13 | -1.82  | 0.77 |       |
|                         | TT | 3  | -.31   | 2.48 |       | TT | 3  | -1.79  | 0.78 |       |
| Ghrelin/<br>obestatin * | CC | 27 | -8.38  | ref  | 0.749 | GG | 29 | -8.34  | ref  | 0.923 |
|                         | TC | 15 | -8.52  | 0.91 |       | TG | 13 | -8.53  | 0.88 |       |
|                         | TT | 3  | -7.72  | 1.58 |       | TT | 3  | -8.18  | 1.12 |       |
| Somatostatin *          | CC | 27 | -2.38  | ref  | 0.212 | GG | 29 | -2.30  | ref  | 0.617 |
|                         | TC | 15 | -2.89  | 0.70 |       | TG | 13 | -2.78  | 0.72 |       |
|                         | TT | 3  | -1.26  | 2.17 |       | TT | 3  | -2.80  | 0.71 |       |
| Chromogranin A *        | CC | 27 | -3.01  | ref  | 0.705 | GG | 29 | -2.95  | ref  | 0.963 |
|                         | TC | 15 | -2.94  | 1.05 |       | TG | 13 | -2.88  | 1.05 |       |
|                         | TT | 3  | -2.37  | 1.56 |       | TT | 3  | -3.10  | 0.90 |       |

\* expression of assays, normalized to expression level of reference gene B2M, Log 2 scale

\*\* p-values for univariate linear regression under an additive genetic model for SNPs, not adjusted for covariates

**Supplementary Table 6D. Sample characteristics and *T2F7L2* expression by genotypes of SNPs in colon, n=128**

| Traits and assays | rs7903146  |    |        |      |            | rs12255372 |    |        |      |            |
|-------------------|------------|----|--------|------|------------|------------|----|--------|------|------------|
|                   | geno types | n  | mean   | fold | p-value ** | geno types | n  | mean   | fold | p-value ** |
| BMI, kg/m2        | CC         | 48 | 27.06  | ref  | 0.547      | GG         | 46 | 27.38  | ref  | 0.933      |
|                   | TC         | 25 | 27.74  | 1.03 |            | TG         | 28 | 27.58  | 1.01 |            |
|                   | TT         | 7  | 30.04  | 1.11 |            | TT         | 6  | 28.47  | 1.04 |            |
| Age, years        | CC         | 73 | 57.92  | ref  | 0.991      | GG         | 70 | 56.50  | ref  | 0.336      |
|                   | TC         | 44 | 57.66  | 1.00 |            | TG         | 48 | 60.50  | 1.07 |            |
|                   | TT         | 10 | 57.20  | 1.00 |            | TT         | 9  | 53.11  | 0.94 |            |
| TSS1 *            | CC         | 49 | -2.94  | ref  | 0.313      | GG         | 47 | -2.89  | ref  | 0.839      |
|                   | TC         | 29 | -2.98  | 0.97 |            | TG         | 31 | -2.98  | 0.94 |            |
|                   | TT         | 5  | -2.46  | 1.39 |            | TT         | 5  | -2.93  | 0.97 |            |
| TSS2 *            | CC         | 49 | -5.65  | ref  | 0.843      | GG         | 45 | -5.63  | ref  | 0.962      |
|                   | TC         | 28 | -5.69  | 0.97 |            | TG         | 31 | -5.67  | 0.97 |            |
|                   | TT         | 4  | -5.47  | 1.13 |            | TT         | 5  | -5.71  | 0.95 |            |
| TSS3 *            | CC         | 49 | -13.12 | ref  | 0.722      | GG         | 45 | -13.08 | ref  | 0.568      |
|                   | TC         | 28 | -13.25 | 0.91 |            | TG         | 31 | -13.31 | 0.85 |            |
|                   | TT         | 4  | -13.51 | 0.76 |            | TT         | 5  | -13.41 | 0.80 |            |
| ex3a-4 *          | CC         | 49 | -6.68  | ref  | 0.400      | GG         | 45 | -6.65  | ref  | 0.728      |
|                   | TC         | 28 | -6.87  | 0.88 |            | TG         | 31 | -6.83  | 0.88 |            |
|                   | TT         | 4  | -6.25  | 1.35 |            | TT         | 5  | -6.76  | 0.93 |            |
| ex7-8 *           | CC         | 49 | -5.21  | ref  | 0.538      | GG         | 45 | -5.22  | ref  | 0.509      |
|                   | TC         | 28 | -5.40  | 0.88 |            | TG         | 31 | -5.34  | 0.92 |            |
|                   | TT         | 4  | -5.53  | 0.80 |            | TT         | 5  | -5.66  | 0.74 |            |
| ex11-13 *         | CC         | 52 | -11.59 | ref  | 0.999      | GG         | 50 | -11.55 | ref  | 0.644      |
|                   | TC         | 29 | -11.60 | 0.99 |            | TG         | 31 | -11.71 | 0.90 |            |
|                   | TT         | 5  | -11.60 | 0.99 |            | TT         | 8  | -11.35 | 1.15 |            |
| ex12-13 *         | CC         | 51 | -10.81 | ref  | 0.834      | GG         | 49 | -10.74 | ref  | 0.920      |
|                   | TC         | 29 | -10.68 | 1.09 |            | TG         | 31 | -10.85 | 0.93 |            |
|                   | TT         | 5  | -10.75 | 1.04 |            | TT         | 5  | -10.71 | 1.02 |            |
| ex13-13a *        | CC         | 49 | -13.95 | ref  | 0.507      | GG         | 47 | -13.90 | ref  | 0.431      |
|                   | TC         | 29 | -13.73 | 1.16 |            | TG         | 31 | -13.78 | 1.09 |            |
|                   | TT         | 5  | -14.21 | 0.84 |            | TT         | 5  | -14.41 | 0.70 |            |
| ex11-13a *        | CC         | 52 | -8.53  | ref  | 0.798      | GG         | 50 | -8.53  | ref  | 0.264      |
|                   | TC         | 30 | -8.52  | 1.01 |            | TG         | 31 | -8.37  | 1.12 |            |
|                   | TT         | 5  | -8.25  | 1.21 |            | TT         | 5  | -9.04  | 0.70 |            |
| ex11-14 *         | CC         | 52 | -8.73  | ref  | 0.577      | GG         | 50 | -8.72  | ref  | 0.752      |
|                   | TC         | 31 | -8.62  | 1.08 |            | TG         | 32 | -8.62  | 1.07 |            |
|                   | TT         | 5  | -8.45  | 1.28 |            | TT         | 5  | -8.53  | 1.14 |            |
| ex13-14 *         | CC         | 57 | -8.45  | ref  | 0.215      | GG         | 54 | -8.36  | ref  | 0.294      |
|                   | TC         | 33 | -8.45  | 1.00 |            | TG         | 37 | -8.70  | 0.79 |            |
|                   | TT         | 8  | -9.10  | 0.64 |            | TT         | 8  | -8.64  | 0.82 |            |
| ex13-13b *        | CC         | 59 | -12.55 | ref  | 0.290      | GG         | 56 | -12.40 | ref  | 0.200      |

|                  |    |    |        |      |       |    |    |        |      |       |
|------------------|----|----|--------|------|-------|----|----|--------|------|-------|
|                  | TC | 33 | -12.56 | 0.99 |       | TG | 37 | -12.83 | 0.74 |       |
|                  | TT | 9  | -12.63 | 0.95 |       | TT | 8  | -13.33 | 0.52 |       |
| VIP *            | CC | 58 | -5.92  | ref  | 0.211 | GG | 55 | -5.81  | ref  | 0.540 |
|                  | TC | 34 | -5.79  | 1.09 |       | TG | 38 | -6.11  | 0.81 |       |
|                  | TT | 9  | -6.71  | 0.58 |       | TT | 8  | -6.19  | 0.77 |       |
| Proglucagon *    | CC | 56 | -7.82  | ref  | 0.173 | GG | 54 | -7.61  | ref  | 0.892 |
|                  | TC | 32 | -7.21  | 1.53 |       | TG | 36 | -7.63  | 0.99 |       |
|                  | TT | 9  | -7.66  | 1.12 |       | TT | 7  | -7.34  | 1.21 |       |
| Somatostatin *   | CC | 58 | -8.61  | ref  | 0.565 | GG | 55 | -8.44  | ref  | 0.419 |
|                  | TC | 33 | -8.25  | 1.28 |       | TG | 37 | -8.66  | 0.86 |       |
|                  | TT | 9  | -8.55  | 1.04 |       | TT | 8  | -7.89  | 1.46 |       |
| Chromogranin A * | CC | 58 | -4.52  | ref  | 0.214 | GG | 55 | -4.27  | ref  | 0.912 |
|                  | TC | 33 | -3.99  | 1.44 |       | TG | 37 | -4.37  | 0.93 |       |
|                  | TT | 9  | -4.12  | 1.32 |       | TT | 8  | -4.17  | 1.07 |       |

\* expression of assays, normalized to expression level of reference gene B2M, Log 2 scale

\*\* p-values for univariate linear regression under an additive genetic model for SNPs, not adjusted for covariates



**Supplementary Table 6E. Sample characteristics and *T2F7L2* expression by genotypes of SNPs in peripheral blood monocytes, n=65**

| Traits and assays | rs7903146  |    |        |      |            | rs12255372 |    |        |      |            |
|-------------------|------------|----|--------|------|------------|------------|----|--------|------|------------|
|                   | geno types | n  | mean   | fold | P-value ** | geno types | n  | mean   | fold | P-value ** |
| Age, years        | CC         | 33 | 43.07  | ref  | 0.057      | GG         | 38 | 44.32  | ref  | 0.129      |
|                   | TC         | 23 | 50.74  | 1.18 |            | TG         | 22 | 49.73  | 1.12 |            |
|                   | TT         | 7  | 51.29  | 1.19 |            | TT         | 3  | 56.33  | 1.27 |            |
| TSS1 *            | CC         | 33 | -3.20  | ref  | 0.909      | GG         | 38 | -3.24  | ref  | 0.516      |
|                   | TC         | 23 | -3.08  | 1.09 |            | TG         | 24 | -2.96  | 1.21 |            |
|                   | TT         | 7  | -3.12  | 1.06 |            | TT         | 3  | -3.40  | 0.90 |            |
| TSS2 *            | CC         | 33 | -5.02  | ref  | 0.781      | GG         | 38 | -5.06  | ref  | 0.283      |
|                   | TC         | 23 | -4.84  | 1.13 |            | TG         | 24 | -4.70  | 1.28 |            |
|                   | TT         | 7  | -4.90  | 1.09 |            | TT         | 3  | -5.25  | 0.88 |            |
| TSS3 *            | CC         | 33 | -9.01  | ref  | 0.731      | GG         | 38 | -9.16  | ref  | 0.115      |
|                   | TC         | 23 | -8.90  | 1.08 |            | TG         | 24 | -8.61  | 1.46 |            |
|                   | TT         | 7  | -8.80  | 1.16 |            | TT         | 3  | -8.98  | 1.13 |            |
| ex3a-4 *          | CC         | 33 | -6.48  | ref  | 0.759      | GG         | 38 | -6.51  | ref  | 0.129      |
|                   | TC         | 23 | -6.32  | 1.12 |            | TG         | 24 | -6.19  | 1.25 |            |
|                   | TT         | 7  | -6.50  | 0.99 |            | TT         | 3  | -7.03  | 0.70 |            |
| ex7-8 *           | CC         | 33 | -5.63  | ref  | 0.550      | GG         | 38 | -5.60  | ref  | 0.595      |
|                   | TC         | 23 | -5.44  | 1.14 |            | TG         | 24 | -5.48  | 1.09 |            |
|                   | TT         | 7  | -5.85  | 0.86 |            | TT         | 3  | -6.06  | 0.73 |            |
| ex11-13 *         | CC         | 33 | -10.13 | ref  | 0.930      | GG         | 38 | -10.16 | ref  | 0.284      |
|                   | TC         | 23 | -10.10 | 1.02 |            | TG         | 24 | -10.02 | 1.10 |            |
|                   | TT         | 7  | -10.18 | 0.97 |            | TT         | 3  | -10.49 | 0.80 |            |
| ex12-13 *         | CC         | 33 | -7.48  | ref  | 0.969      | GG         | 38 | -7.49  | ref  | 0.577      |
|                   | TC         | 23 | -7.52  | 0.97 |            | TG         | 24 | -7.47  | 1.01 |            |
|                   | TT         | 7  | -7.51  | 0.98 |            | TT         | 3  | -7.88  | 0.76 |            |
| ex13-13a *        | CC         | 33 | -10.33 | ref  | 0.762      | GG         | 38 | -10.33 | ref  | 0.551      |
|                   | TC         | 23 | -10.42 | 0.94 |            | TG         | 24 | -10.43 | 0.93 |            |
|                   | TT         | 7  | -10.51 | 0.88 |            | TT         | 3  | -10.72 | 0.76 |            |
| ex11-13a *        | CC         | 33 | -8.58  | ref  | 0.915      | GG         | 38 | -8.60  | ref  | 0.804      |
|                   | TC         | 23 | -8.60  | 0.99 |            | TG         | 24 | -8.57  | 1.02 |            |
|                   | TT         | 7  | -8.66  | 0.95 |            | TT         | 3  | -8.76  | 0.90 |            |
| ex11-14 *         | CC         | 33 | -7.19  | ref  | 0.834      | GG         | 38 | -7.17  | ref  | 0.837      |
|                   | TC         | 23 | -7.14  | 1.04 |            | TG         | 24 | -7.17  | 1.00 |            |
|                   | TT         | 7  | -7.27  | 0.95 |            | TT         | 3  | -7.34  | 0.89 |            |
| ex13-14 *         | CC         | 33 | -6.95  | ref  | 0.293      | GG         | 38 | -6.94  | ref  | 0.259      |
|                   | TC         | 23 | -6.69  | 1.20 |            | TG         | 24 | -6.60  | 1.27 |            |
|                   | TT         | 7  | -6.53  | 1.34 |            | TT         | 3  | -6.72  | 1.16 |            |

\* expression of assays, normalized to expression level of reference gene B2M, Log 2 scale

\*\* p-values for univariate linear regression under an additive genetic model for SNPs, not adjusted for covariates

**Supplementary Table 6F. Sample characteristics and *T2F7L2* expression by genotypes of SNPs in liver, n=62**

| Traits and assays | rs7903146  |    |        |      |            | rs12255372 |    |        |      |            |
|-------------------|------------|----|--------|------|------------|------------|----|--------|------|------------|
|                   | geno types | n  | mean   | fold | p-value ** | geno types | n  | mean   | fold | p-value ** |
| Age, years        | CC         | 29 | 49.03  | ref  | 0.841      | GG         | 33 | 49.60  | ref  | 0.820      |
|                   | TC         | 27 | 48.96  | 0.99 |            | TG         | 23 | 48.13  | 0.97 |            |
|                   | TT         | 3  | 40.67  | 0.83 |            | TT         | 3  | 40.67  | 0.82 |            |
| TSS1 *            | CC         | 31 | -4.97  | ref  | 0.656      | GG         | 34 | -5.00  | ref  | 0.651      |
|                   | TC         | 28 | -4.99  | 0.99 |            | TG         | 25 | -4.95  | 1.04 |            |
|                   | TT         | 3  | -4.32  | 1.57 |            | TT         | 3  | -4.32  | 1.60 |            |
| TSS2 *            | CC         | 31 | -4.31  | ref  | 0.605      | GG         | 34 | -4.33  | ref  | 0.616      |
|                   | TC         | 28 | -4.36  | 0.97 |            | TG         | 25 | -4.35  | 0.99 |            |
|                   | TT         | 3  | -3.71  | 1.52 |            | TT         | 3  | -3.71  | 1.54 |            |
| TSS3 *            | CC         | 31 | -10.96 | ref  | 0.912      | GG         | 34 | -10.91 | ref  | 0.716      |
|                   | TC         | 28 | -11.07 | 0.93 |            | TG         | 25 | -11.14 | 0.85 |            |
|                   | TT         | 3  | -10.93 | 1.02 |            | TT         | 3  | -10.93 | 0.99 |            |
| ex3a-4 *          | CC         | 31 | -4.09  | ref  | 0.455      | GG         | 34 | -4.09  | ref  | 0.404      |
|                   | TC         | 28 | -4.37  | 0.82 |            | TG         | 25 | -4.41  | 0.80 |            |
|                   | TT         | 3  | -3.62  | 1.39 |            | TT         | 3  | -3.62  | 1.39 |            |
| ex7-8 *           | CC         | 31 | -0.66  | ref  | 0.998      | GG         | 34 | -0.62  | ref  | 0.857      |
|                   | TC         | 28 | -0.67  | 0.99 |            | TG         | 25 | -0.74  | 0.92 |            |
|                   | TT         | 3  | -0.65  | 1.01 |            | TT         | 3  | -0.67  | 0.97 |            |
| ex11-13 *         | CC         | 31 | -8.65  | ref  | 0.967      | GG         | 34 | -8.63  | ref  | 0.973      |
|                   | TC         | 28 | -8.62  | 1.02 |            | TG         | 25 | -8.64  | 0.99 |            |
|                   | TT         | 3  | -8.53  | 1.09 |            | TT         | 3  | -8.53  | 1.07 |            |
| ex12-13 *         | CC         | 31 | -8.09  | ref  | 0.579      | GG         | 34 | -8.10  | ref  | 0.561      |
|                   | TC         | 28 | -8.36  | 0.83 |            | TG         | 25 | -8.38  | 0.82 |            |
|                   | TT         | 3  | -7.88  | 1.16 |            | TT         | 3  | -7.88  | 1.16 |            |
| ex13-13a *        | CC         | 31 | -9.37  | ref  | 0.859      | GG         | 34 | -9.37  | ref  | 0.862      |
|                   | TC         | 28 | -9.47  | 0.93 |            | TG         | 25 | -9.47  | 0.93 |            |
|                   | TT         | 3  | -9.11  | 1.20 |            | TT         | 3  | -9.11  | 1.20 |            |
| ex11-13a *        | CC         | 31 | -7.28  | ref  | 0.751      | GG         | 34 | -7.28  | ref  | 0.756      |
|                   | TC         | 28 | -7.31  | 0.98 |            | TG         | 25 | -7.31  | 0.98 |            |
|                   | TT         | 3  | -6.84  | 1.36 |            | TT         | 3  | -6.84  | 1.36 |            |
| ex11-14 *         | CC         | 31 | -7.08  | ref  | 0.522      | GG         | 34 | -7.07  | ref  | 0.516      |
|                   | TC         | 28 | -6.91  | 1.13 |            | TG         | 25 | -6.90  | 1.13 |            |
|                   | TT         | 3  | -6.28  | 1.74 |            | TT         | 3  | -6.28  | 1.73 |            |
| ex13-14 *         | CC         | 31 | -8.30  | ref  | 0.619      | GG         | 34 | -8.29  | ref  | 0.504      |
|                   | TC         | 28 | -8.52  | 0.86 |            | TG         | 25 | -8.56  | 0.83 |            |
|                   | TT         | 3  | -8.18  | 1.09 |            | TT         | 3  | -8.18  | 1.08 |            |

\* expression of assays, normalized to expression level of reference gene B2M, Log 2 scale

\*\* p-values for univariate linear regression under an additive genetic model for SNPs, not adjusted for covariates

**Supplementary Table 6G. Sample characteristics and *T2F7L2* expression by genotypes of SNPs in subcutaneous adipose tissue, n=14**

| Traits and assays | rs7903146  |   |       |      |            | rs12255372 |   |       |      |            |
|-------------------|------------|---|-------|------|------------|------------|---|-------|------|------------|
|                   | geno types | n | mean  | fold | p-value ** | geno types | n | mean  | fold | p-value ** |
| BMI, kg/m2        | CC         | 7 | 32.09 | ref  | 0.206      | GG         | 6 | 32.07 | ref  | 0.252      |
|                   | TC         | 6 | 27.63 | 0.86 |            | TG         | 7 | 28.29 | 0.88 |            |
|                   | TT         | 1 | 20.00 | 0.62 |            | TT         | 1 | 20.00 | 0.62 |            |
| Age, years        | CC         | 7 | 45.71 | ref  | 0.331      | GG         | 6 | 46.33 | ref  | 0.508      |
|                   | TC         | 5 | 50.40 | 1.10 |            | TG         | 6 | 49.00 | 1.06 |            |
|                   | TT         | 1 | 40.00 | 0.88 |            | TT         | 1 | 40.00 | 0.86 |            |
| P1ex1 *           | CC         | 7 | -1.13 | ref  | 0.606      | GG         | 6 | -1.18 | ref  | 0.561      |
|                   | TC         | 6 | -0.84 | 1.22 |            | TG         | 7 | -0.85 | 1.26 |            |
|                   | TT         | 1 | -1.55 | 0.75 |            | TT         | 1 | -1.55 | 0.77 |            |
| P2ex1 *           | CC         | 7 | -2.34 | ref  | 0.900      | GG         | 6 | -2.28 | ref  | 0.816      |
|                   | TC         | 6 | -2.49 | 0.90 |            | TG         | 7 | -2.52 | 0.85 |            |
|                   | TT         | 1 | -2.18 | 1.12 |            | TT         | 1 | -2.18 | 1.07 |            |
| P2intr1 *         | CC         | 7 | -6.67 | ref  | 0.254      | GG         | 6 | -6.71 | ref  | 0.233      |
|                   | TC         | 6 | -7.00 | 0.80 |            | TG         | 7 | -6.92 | 0.86 |            |
|                   | TT         | 1 | -5.04 | 3.10 |            | TT         | 1 | -5.04 | 3.18 |            |
| ex3a-4 *          | CC         | 7 | -4.30 | ref  | 0.242      | GG         | 6 | -4.22 | ref  | 0.423      |
|                   | TC         | 6 | -4.27 | 1.02 |            | TG         | 7 | -4.34 | 0.92 |            |
|                   | TT         | 1 | -2.89 | 2.66 |            | TT         | 1 | -2.89 | 2.51 |            |
| ex7-8 *           | CC         | 7 | -4.25 | ref  | 0.523      | GG         | 6 | -4.20 | ref  | 0.539      |
|                   | TC         | 6 | -4.20 | 1.04 |            | TG         | 7 | -4.25 | 0.97 |            |
|                   | TT         | 1 | -3.22 | 2.04 |            | TT         | 1 | -3.22 | 1.97 |            |
| ex11-13 *         | CC         | 7 | -6.64 | ref  | 0.704      | GG         | 6 | -6.59 | ref  | 0.781      |
|                   | TC         | 6 | -6.50 | 1.10 |            | TG         | 7 | -6.56 | 1.02 |            |
|                   | TT         | 1 | -6.20 | 1.36 |            | TT         | 1 | -6.20 | 1.31 |            |
| ex12-13 *         | CC         | 7 | -6.00 | ref  | 0.291      | GG         | 6 | -5.93 | ref  | 0.272      |
|                   | TC         | 6 | -6.00 | 1.00 |            | TG         | 7 | -6.06 | 0.91 |            |
|                   | TT         | 1 | -4.85 | 2.22 |            | TT         | 1 | -4.85 | 2.11 |            |
| ex13-13a *        | CC         | 7 | -8.57 | ref  | 0.113      | GG         | 6 | -8.47 | ref  | 0.113      |
|                   | TC         | 6 | -8.47 | 1.07 |            | TG         | 7 | -8.57 | 0.93 |            |
|                   | TT         | 1 | -6.72 | 3.61 |            | TT         | 1 | -6.72 | 3.36 |            |
| ex11-13a *        | CC         | 7 | -7.34 | ref  | 0.504      | GG         | 6 | -7.32 | ref  | 0.591      |
|                   | TC         | 6 | -6.94 | 1.32 |            | TG         | 7 | -7.02 | 1.23 |            |
|                   | TT         | 1 | -6.39 | 1.93 |            | TT         | 1 | -6.39 | 1.91 |            |
| ex11-14 *         | CC         | 7 | -5.07 | ref  | 0.992      | GG         | 6 | -4.96 | ref  | 0.811      |
|                   | TC         | 6 | -5.12 | 0.97 |            | TG         | 7 | -5.20 | 0.85 |            |
|                   | TT         | 1 | -5.10 | 0.98 |            | TT         | 1 | -5.10 | 0.91 |            |
| ex13-14 *         | CC         | 7 | -5.20 | ref  | 0.557      | GG         | 6 | -5.16 | ref  | 0.614      |
|                   | TC         | 6 | -5.04 | 1.12 |            | TG         | 7 | -5.10 | 1.04 |            |
|                   | TT         | 1 | -4.51 | 1.61 |            | TT         | 1 | -4.51 | 1.57 |            |

\* expression of assays, normalized to expression level of reference gene B2M, Log 2 scale; \*\* p-values for univariate linear regression under an additive genetic model for SNPs, not adjusted for covariates

**Supplementary Table 6H. Sample characteristics and *T2F7L2* expression by genotypes of SNPs in skeletal muscles, n=25**

| Traits and assays | rs7903146  |     |       |      |              | rs12255372 |     |       |      |              |
|-------------------|------------|-----|-------|------|--------------|------------|-----|-------|------|--------------|
|                   | geno types | n # | mean  | fold | **p-value    | geno types | n # | mean  | fold | ** p-value   |
| Age, years        | CC         | 16  | 18.19 | ref  | 0.436        | GG         | 12  | 18.75 | ref  | 0.849        |
|                   | TC         | 4   | 28.00 | 1.53 |              | TG         | 9   | 21.33 | 1.13 |              |
|                   | TT         | 5   | 15.80 | 0.87 |              | TT         | 4   | 16.25 | 0.87 |              |
| TSS1 *            | CC         | 18  | -2.09 | ref  | 0.970        | GG         | 13  | -2.20 | ref  | 0.227        |
|                   | TC         | 4   | -2.05 | 1.03 |              | TG         | 10  | -1.85 | 1.27 |              |
|                   | TT         | 6   | -2.04 | 1.04 |              | TT         | 5   | -2.19 | 1.01 |              |
| TSS2 *            | CC         | 18  | -3.49 | ref  | 0.547        | GG         | 13  | -3.57 | ref  | 0.182        |
|                   | TC         | 4   | -3.26 | 1.17 |              | TG         | 10  | -3.23 | 1.27 |              |
|                   | TT         | 6   | -3.32 | 1.12 |              | TT         | 5   | -3.39 | 1.14 |              |
| TSS3 *            | CC         | 17  | -8.71 | ref  | 0.558        | GG         | 12  | -8.79 | ref  | 0.397        |
|                   | TC         | 4   | -8.42 | 1.22 |              | TG         | 10  | -8.38 | 1.33 |              |
|                   | TT         | 6   | -8.39 | 1.25 |              | TT         | 5   | -8.56 | 1.18 |              |
| ex3a-4 *          | CC         | 18  | -4.91 | ref  | 0.346        | GG         | 13  | -5.00 | ref  | 0.110        |
|                   | TC         | 4   | -4.46 | 1.36 |              | TG         | 10  | -4.55 | 1.38 |              |
|                   | TT         | 6   | -4.85 | 1.04 |              | TT         | 5   | -4.94 | 1.05 |              |
| ex7-8 *           | CC         | 18  | -4.43 | ref  | 0.749        | GG         | 13  | -4.59 | ref  | <b>0.049</b> |
|                   | TC         | 4   | -4.27 | 1.12 |              | TG         | 10  | -4.10 | 1.40 |              |
|                   | TT         | 6   | -4.29 | 1.10 |              | TT         | 5   | -4.41 | 1.13 |              |
| ex11-13 *         | CC         | 18  | -6.92 | ref  | <b>0.009</b> | GG         | 13  | -7.03 | ref  | <b>0.005</b> |
|                   | TC         | 4   | -6.10 | 1.76 |              | TG         | 10  | -6.33 | 1.63 |              |
|                   | TT         | 6   | -6.44 | 1.39 |              | TT         | 5   | -6.56 | 1.39 |              |
| ex12-13 *         | CC         | 18  | -6.62 | ref  | 0.474        | GG         | 13  | -6.71 | ref  | 0.370        |
|                   | TC         | 4   | -6.62 | 1.00 |              | TG         | 10  | -6.45 | 1.20 |              |
|                   | TT         | 6   | -6.26 | 1.28 |              | TT         | 5   | -6.29 | 1.34 |              |
| ex13-13a *        | CC         | 18  | -9.51 | ref  | 0.831        | GG         | 13  | -9.55 | ref  | 0.800        |
|                   | TC         | 4   | -9.46 | 1.03 |              | TG         | 10  | -9.38 | 1.12 |              |
|                   | TT         | 6   | -9.32 | 1.14 |              | TT         | 5   | -9.40 | 1.11 |              |
| ex11-13a *        | CC         | 18  | -8.74 | ref  | 0.735        | GG         | 13  | -8.81 | ref  | 0.481        |
|                   | TC         | 4   | -8.50 | 1.18 |              | TG         | 10  | -8.53 | 1.21 |              |
|                   | TT         | 6   | -8.70 | 1.03 |              | TT         | 5   | -8.74 | 1.05 |              |
| ex11-14 *         | CC         | 18  | -5.88 | ref  | 0.094        | GG         | 13  | -6.03 | ref  | <b>0.008</b> |
|                   | TC         | 4   | -5.34 | 1.45 |              | TG         | 10  | -5.39 | 1.56 |              |
|                   | TT         | 6   | -5.50 | 1.30 |              | TT         | 5   | -5.59 | 1.36 |              |
| ex13-14 *         | CC         | 17  | -6.44 | ref  | 0.357        | GG         | 12  | -6.51 | ref  | 0.170        |
|                   | TC         | 4   | -5.95 | 1.40 |              | TG         | 10  | -6.05 | 1.38 |              |
|                   | TT         | 6   | -6.30 | 1.10 |              | TT         | 5   | -6.48 | 1.02 |              |

\* expression of assays, normalized to expression level of reference gene B2M, Log 2 scale

\*\* p-values for univariate linear regression under an additive genetic model for SNPs not adjusted for covariates; in bold p-values <0.05; # - samples for expression analysis were selected based on genotypes

**Supplementary Table 7. Primers and probes for expression assays used in this study**

| Expression assays, Type     | Primers, probes or commercial assays from Applied Biosystems                                                 | Amplicon size, bp |
|-----------------------------|--------------------------------------------------------------------------------------------------------------|-------------------|
| TCF7L2,TSS1<br>SYBR Green   | P1ex1F: GGTGGAGGGGATGACCTA<br>Ex3R: GGGATCATGATGAAGGGGTA                                                     | 307 bp            |
| TCF7L2, TSS2<br>SYBR Green  | P2ex1F: AAACGAATCAAAACAGCTCCT<br>Ex3R: GGGATCATGATGAAGGGGTA                                                  | 168 bp            |
| TCF7L2, TSS3<br>SYBR Green  | P2intr1F: TTCTTTTTCTCCCCCTTCTCC<br>Ex3R: GGGATCATGATGAAGGGGTA                                                | 211 bp            |
| TCF7L2, ex3a<br>SYBR Green  | Ex3aF: ACTCTGCGTACAAAACGATTGA<br>Ex4R: AGCAGTGGCCATTTTCATCTG                                                 | 66 bp             |
| TCF7L2, ex4a<br>SYBR Green  | Ex4F: GGCCACTGCTGATGTCC<br>Ex4aR: TGAGTGCTGACAGTGAAGTCTG                                                     | 162 bp            |
| TCF7L2, ex7-8,<br>TaqMan    | Hs00181036_m1                                                                                                |                   |
| TCF7L2,<br>ex11-13, TaqMan  | Ex11F: GAAGAAGAGGAAAAGGGACAAGCA<br>Ex13R: GCGCTCGGCATTTCTTAGGA<br>FAM-probe: CAGGTCATTGGTCTCTCC              | 70 bp             |
| TCF7L2,<br>ex11-13a, TaqMan | Ex11F: GAAGAAGAGGAAAAGGGACAAGCA<br>Ex13aR: CGGTCAAGCCCGAACAGT<br>FAM-probe: ACCAATGATGCAAATACT               | 86 bp             |
| TCF7L2,<br>ex11-14, TaqMan  | Ex11F: CGCGGGATAACTATGGAAAAGAAGAA<br>Ex14R: CTTGTATGTAGCGAACGCACTTTT<br>FAM-probe: TTTTCTCATTGGTCTCTCCCGGCTG | 94 bp             |
| TCF7L2,<br>ex12-13, TaqMan  | Ex12F: ACACAGCGAATGTTTCCTAAATCCT<br>Ex13R: CGCGCTCGGCATTTCTTAG<br>FAM-probe: TTCCTCCGATTACAGACCTG            | 80 bp             |
| TCF7L2,<br>ex13-13a, TaqMan | Ex13F: GCTTTGGCCTTGATCAACAGAATAA<br>Ex13aR: CGGTCAAGCCCGAACAGT<br>FAM-probe: TTGCAGATGCAAATACT               | 88 bp             |
| TCF7L2,<br>ex13-14, TaqMan  | Ex13F: GCTTTGGCCTTGATCAACAGAATAA<br>Ex14R: CTTGTATGTAGCGAACGCACTTTT<br>FAM-probe: TCTCCTGCAAGGGCC            | 74 bp             |

|                                              |                                                                                                    |       |
|----------------------------------------------|----------------------------------------------------------------------------------------------------|-------|
| TCF7L2,<br>ex13-13b, TaqMan                  | Ex13F: GCTTTGGCCTTGATCAACAGAATAA<br>Ex13bR: CGAACGCACTTTTTTTTTCTCCATT<br>FAM-probe: CCCTTGCACTCTTG | 88 bp |
| Proinsulin                                   | Hs02741908_m1                                                                                      |       |
| Proglucagon                                  | HS00174967_m1                                                                                      |       |
| Somatostatin                                 | HS00356144_m1                                                                                      |       |
| Ghrelin/obestatin                            | HS00175082_m1                                                                                      |       |
| Chromogranin A                               | HS00900373_m1                                                                                      |       |
| PDX1 (Insulin –promoter Factor 1,<br>IPF1)   | Hs00236830_m1                                                                                      |       |
| Vasoactive Intestinal Peptide<br>(VIP)       | HS00175021_m1                                                                                      |       |
| Proliferating Cell Nuclear Antigen<br>(PCNA) | HS00427214_g1                                                                                      |       |
| GAPDH                                        | 4333764F                                                                                           |       |
| B2M                                          | HS00173470_m1                                                                                      |       |

**Supplementary Figure 1. Relative expression of *TCF7L2* assays in 289 samples from 8 human tissues**

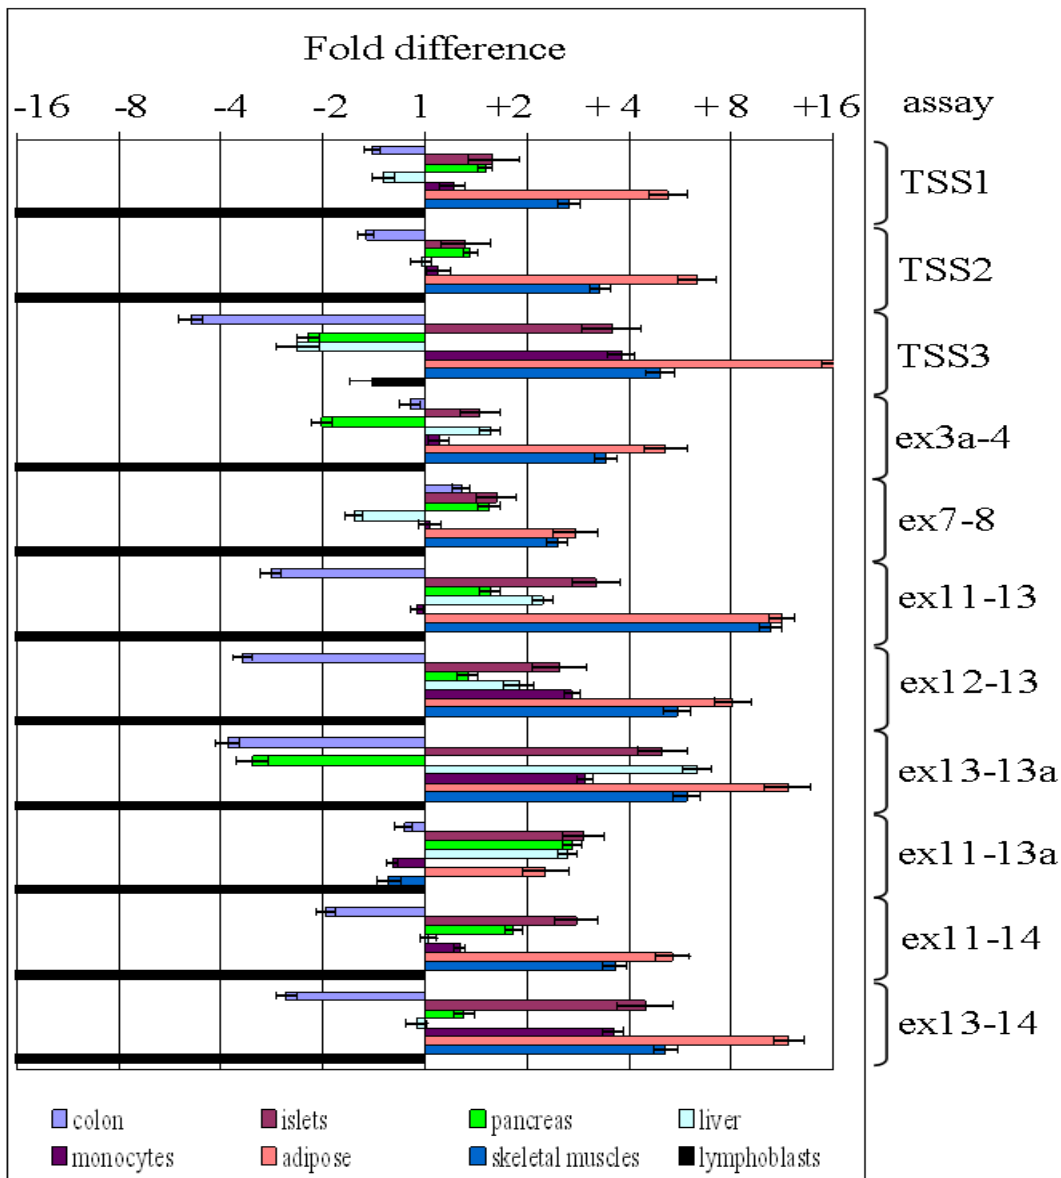

Expression in each tissue is normalized to levels of endogenous control B2M and presented as fold difference relative to the mean expression of all tissue samples (on log<sub>2</sub> scale) for each assay. Low expression in lymphoblastoid cell lines is not shown in full scale. Error bars indicate mean values with 95% confidence intervals. This figure illustrates lower variation in expression of some assays – TSS1, “ex7-8”, “ex11-13a” and higher variation in expression of other assays – TSS3, “ex11-13”, ex12-13”, “ex13-13a”, “ex13-14”.

## Supplementary Figure 2.

Difference in expression of *TCF7L2* assays between pancreas and pancreatic islets.

A “zero” dotted line represents similar expression between the tissues. Error bars show 95% confidence intervals in expression.

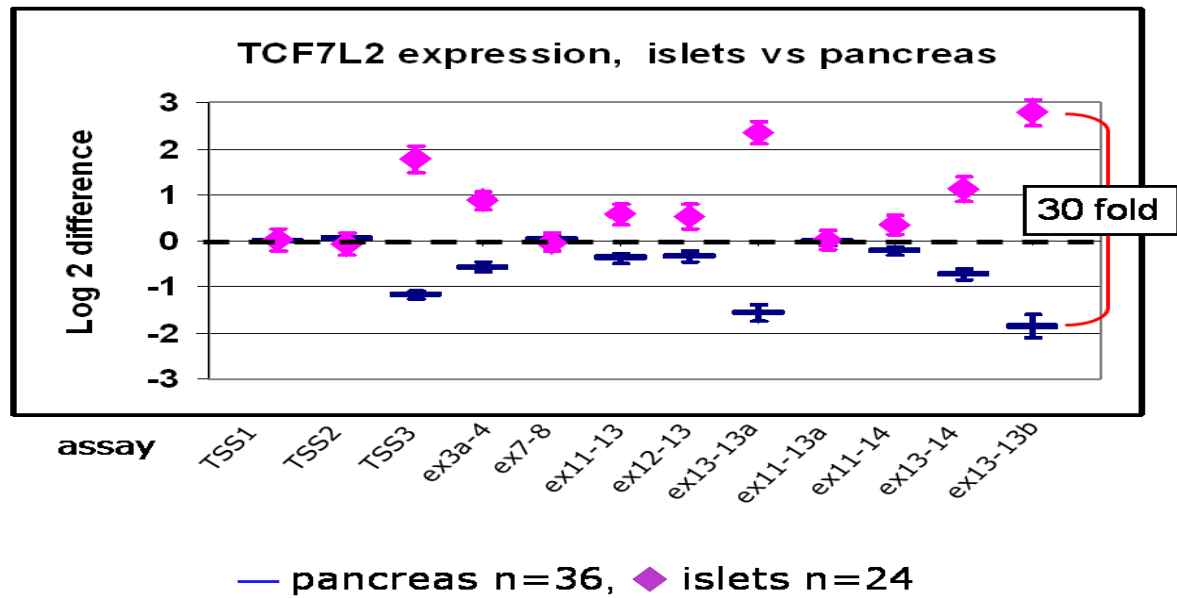

Supplement: ddp321_1.pdf [file ddp321_1.pdf]
